# Supplementary material
Source: ML conference proceedings conference paper supplement (https://openreview.net/forum?id=C5MQUlzhVjQ)
Supplement: supplementary_material [file attachment]

## A Algorithm: Differentiable Surrogate Assisted Scenario Generation

The improvements proposed in Sec. 4 result in two versions of our algorithm. In Algorithm 1, we present DSAS with the state-of-the-art DQD algorithm CMA-MAEGA in the inner loop. SAS follows a similar structure but with CMA-MAE in the inner loop.

On each iteration of the outer loop, we initialize a new surrogate archive to store solutions that the surrogate model predicts are high performing and diverse (line 3). Then, we begin the inner loop (line 5). On line 6, we evaluate the current solution point  $\theta$  with the surrogate model to obtain the predicted objective  $\hat{f}$ , measures  $\hat{m}$ , and the branching gradients  $\nabla_{\hat{f}}$  and  $\nabla_{\hat{m}}$ . We then add the solution  $\theta$  to the surrogate archive (line 8) based on the predicted evaluations, after applying the regularization penalty (line 7). Next, we generate a batch of solutions based on the branching gradients (line 9). For each solution, we sample gradient coefficients, which, combined with the gradients, produce a new candidate solution (lines 10-12). We evaluate each new candidate solution  $\theta'_i$  with the surrogate model (line 13), apply the regularization penalty (line 14), and add the solution to the surrogate archive (line 15). After processing a batch, we update the search parameters of CMA-MAEGA to move the search towards maximizing the QD objective (line 17).

After completing an inner loop, we select a subset of solutions from the surrogate archive to label (line 19). For each set of scenario parameters  $\theta$ , we generate-and-repair a scenario (line 21), evaluate the robotic system on the scenario (line 22), update our dataset by adding the scenario labeled with the true objective  $f$ , measures  $m$ , robot occupancy grid  $y_r$ , and human occupancy grid  $y_h$  (line 23), and finally add the scenario to our ground-truth archive (line 24). After updating the training data with newly labeled scenarios, we train the occupancy predictor for both the robot (line 27) and human (line 28), then train the surrogate model to predict the objectives and measures (line 29). The inner loop in future iterations exploits the more accurate surrogate model to produce better scenarios.

## B Surrogate Model Details

Our surrogate model follows a two-stage prediction process by first predicting the robot and the human occupancy grids given the scenario parameters as input, followed by a downstream prediction of the objective and measures.

The occupancy predictor (blue arrows in Fig. 6) consists of deconvolution layers followed by batch normalization and ReLU that treat the scenario parameters as a  $1 \times 1$  image with the number of channels equal to the solution size and expand it into a  $32 \times 32$  image. In the shared control teleoperation domain, there is only one occupancy grid since only the robot arm is moving. In the shared workspace collaboration domain, there are two occupancy grids (stacked into two channels) corresponding to the robot and the human motion. We pass each channel in the final output through a softmax operator and minimize the KL divergence loss between the predicted and the true occupancy grids.

The downstream predictor (red arrows in Fig. 6) consists of a fully connected network with linear layers followed by batch normalization and ReLU to extract features from the scenario parameters. It also consists of convolutional layers followed by batch normalization and leaky ReLU to extract features from the occupancy grids. We pass the features through a linear layer and minimize the mean squared error (MSE) between the predicted and the true objective and measures.

The losses for the occupancy predictor and the downstream predictor have different scales and hence, are hard to balance. Thus, we separately train both networks on data obtained from ground-truth evaluations for 100 epochs in each outer iteration using Adam [62] optimizer with a learning rate of 0.0001 and batch size of 64. We first train the occupancy predictor, freeze the weights, and then train the downstream predictor by leveraging occupancy predictions from the occupancy predictor. We implement and train the networks with the PyTorch library [63].

---

**Algorithm 1:** Differentiable Surrogate Assisted Scenario Generation (DSAS).

---

**Input:**  $N$ : Maximum number of evaluations,  $N_{exploit}$ : Number of iterations in the model exploitation phase,  $\theta_0$ : Initial solution for CMA-MAEGA,  $B$ : Batch size for CMA-MAEGA

**Output:** Final version of the ground-truth archive  $\mathcal{A}_{gt}$

```

1 Initialize the ground-truth archive  $\mathcal{A}_{gt}$ , the dataset  $\mathcal{D}$ , robot occupancy predictor  $sm_r$ , human
  occupancy predictor  $sm_h$ , objective and measure predictor  $sm$ 
2 while  $evals < N$  do
3   Initialize CMA-MAEGA with the surrogate archive  $\mathcal{A}_{surr}$  and initialize solution  $\theta$  to  $\theta_0$ 
4   Initialize CMA-ES parameters  $\mu, \Sigma$ 
5   for  $itr \in \{1, 2, \dots, N_{exploit}\}$  do
6      $\hat{f}, \nabla_{\hat{f}}, \hat{m}, \nabla_{\hat{m}} \leftarrow sm(\theta, sm_r(\theta), sm_h(\theta))$ 
7      $\hat{f} \leftarrow \hat{f} - reg(\theta)$ 
8      $\mathcal{A}_{surr} \leftarrow add\_solution(\mathcal{A}_{surr}, (\theta, \hat{f}, \hat{m}))$ 
9     for  $i \in \{1, 2, \dots, B\}$  do
10       $c \sim \mathcal{N}(\mu, \Sigma)$ 
11       $\nabla_i \leftarrow c_0 \nabla_{\hat{f}} + \sum_{j=1}^k (c_j \nabla_{\hat{m}_j})$ 
12       $\theta'_i \leftarrow \theta + \nabla_i$ 
13       $\hat{f}', *, \hat{m}', * \leftarrow sm(\theta'_i, sm_r(\theta'_i), sm_h(\theta'_i))$ 
14       $\hat{f}' \leftarrow \hat{f}' - reg(\theta'_i)$ 
15       $\mathcal{A}_{surr} \leftarrow add\_solution(\mathcal{A}_{surr}, (\theta'_i, \hat{f}', \hat{m}'))$ 
16    end
17    Update  $\theta, \mu, \Sigma$  via CMA-MAEGA update rules
18  end
19   $\Theta \leftarrow select\_solutions(\mathcal{A}_{surr})$ 
20  for  $\theta \in \Theta$  do
21     $scenario \leftarrow G(\theta)$ 
22     $f, m, y_r, y_h \leftarrow evaluate(scenario)$ 
23     $\mathcal{D} \leftarrow \mathcal{D} \cup (\theta, f, m, y_r, y_h)$ 
24     $\mathcal{A}_{gt} \leftarrow add\_solution(\mathcal{A}_{gt}, (\theta, f, m))$ 
25     $evals \leftarrow evals + 1$ 
26  end
27   $sm_r.train(\mathcal{D})$ 
28   $sm_h.train(\mathcal{D})$ 
29   $sm.train(\mathcal{D}, sm_r, sm_h)$ 
30 end

```

---

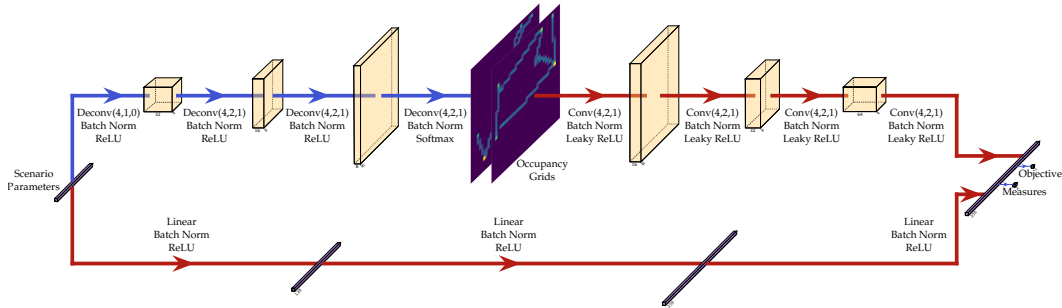

Figure 6: Architecture of the surrogate model including the occupancy predictor (blue arrows) and the downstream predictor (red arrows).

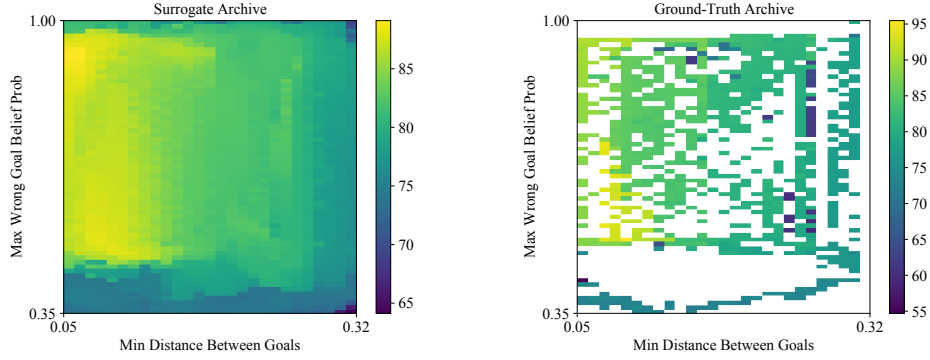

Figure 7: Comparison between the surrogate archive (left) after an inner loop and the corresponding ground-truth archive (right) after evaluating the solutions in the surrogate archive.

Table 1: Mean absolute error of the objective and measure predictions by the surrogate models.

| Domain                       | DSAS          |               |               | SAS           |               |               |
|------------------------------|---------------|---------------|---------------|---------------|---------------|---------------|
|                              | Objective MAE | Measure 1 MAE | Measure 2 MAE | Objective MAE | Measure 1 MAE | Measure 2 MAE |
| Shared Control Teleoperation | 0.35          | 0.01          | 0.01          | 0.64          | 0.02          | 0.01          |
| Collaboration I              | 3.41          | 0.02          | 0.09          | 3.47          | 0.02          | 0.08          |
| Collaboration II             | 3.22          | 0.27          | 0.56          | 3.39          | 0.29          | 0.59          |

## B.1 Evaluating the Surrogate Model Predictions

We evaluate the predictions of the surrogate model similar to DSAGE [21] by taking the dataset generated in one trial of an algorithm and treating it as the test set for the trained surrogate model from another trial of the same algorithm. Table 1 shows the mean absolute error (MAE) in all three domains for the surrogate models trained as a part of both DSAS and SAS. Note that *Measure 1* and *Measure 2* columns in the table correspond to the respective measures in each domain described in Sec. 5.

The surrogate model is able to accurately predict the measures in the shared control teleoperation domain since they can be calculated directly from the solution and do not depend on the robot policy. In contrast, measures that depend on the robot policy such as the maximum wrong goal probability (*Measure 2* in the collaboration I domain) have a comparatively higher error, with predictions being off by around 9% on average.

Furthermore, we observe that the percentage of predictions landing in their true archive cell is only around 2-4% in all domains. Nonetheless, the predictions are close to their true archive cell as evident in the MAEs. We also confirm this by computing the average Manhattan distance between the predicted archive cell and the true archive cell for each solution. In the shared control teleoperation domain, the average Manhattan distance was 6.48 and 11.26 for DSAS and SAS respectively. The average Manhattan distances for DSAS and SAS were 11.26 and 9.88 in the collaboration I domain, and 6.89 and 7.20 in the collaboration II domain, indicating that the predicted archive cells are only a few cells away from the true archive cells on average.

Thus, despite inaccuracies in placing the solutions into their true archive cells, the solutions in the surrogate archive are diverse with respect to the true measure functions. Hence, when these solutions are evaluated, they occupy different parts of the ground-truth archive and rapidly improve the QD-score. Fig. 7 shows the surrogate archive after one inner loop and the corresponding ground-truth archive obtained by evaluating the solutions in the surrogate archive in the collaboration I domain.

## C Mixed Integer Program for Repairing Scenarios

To ensure that the objects in the scenario generated by QD search satisfy the object arrangement constraints in the shared workspace collaboration domain, we adopt a generate-then-repair strategy. We formulate a mixed integer program (MIP) with constraints to ensure that the objects in the scenario are inside the workspace boundaries and not in collision with each other. Since we wish the repaired scenario to be as close as possible to the generated scenario, we set the MIP objective to be the  $L2$  distance between the original position and the repaired position of the objects. The quadratic objective makes the MIP a mixed integer quadratic program (MIQP).

### C.1 Variables and MIP Objective

We treat the  $x$  and  $y$  coordinates of each object as the MIP variables. Let  $x'_i$  and  $y'_i$  be the coordinates of object  $i$  in the generated scenario and let  $x_i$  and  $y_i$  be the corresponding coordinates after MIP repair. We set the objective to be:

$$\min \sum_i (x_i - x'_i)^2 + (y_i - y'_i)^2 \quad (2)$$

### C.2 Constraints

Let  $x_r^{(min)}$ ,  $x_r^{(max)}$ ,  $y_r^{(min)}$ , and  $y_r^{(max)}$  be the minimum and maximum allowed  $x$  and  $y$  values respectively for objects in a rectangular workspace region  $r$ . For each workspace region, we need to construct a binary variable  $z_{ir}^{(in)}$ , which resolves to true if object  $i$  occupies workspace  $r$ . We create four auxiliary decision variables  $z_{ir}^{(up)}$ ,  $z_{ir}^{(dn)}$ ,  $z_{ir}^{(lt)}$ , and  $z_{ir}^{(rt)}$ , representing the four boundary constraints of the rectangle. Specifically,  $z_{ir}^{(up)}$  represents if object  $i$  occupies  $\langle x_i, y_i \rangle$  coordinates below the top of the bounding rectangle for region  $r$ . The variables  $z_{ir}^{(dn)}$ ,  $z_{ir}^{(lt)}$ , and  $z_{ir}^{(rt)}$  satisfy the same conditions for the bottom, left, and right of the bounding rectangle, respectively. For each pair of object  $i$  and region  $r$ , we add the following constraints to the MIP to resolve the decision variables:

$$x_r^{(min)} \leq x_i + \infty(1 - z_{ir}^{(lt)}) \quad (3)$$

$$x_i \leq x_r^{(max)} + \infty(1 - z_{ir}^{(rt)}) \quad (4)$$

$$y_r^{(min)} \leq y_i + \infty(1 - z_{ir}^{(dn)}) \quad (5)$$

$$y_i \leq y_r^{(max)} + \infty(1 - z_{ir}^{(up)}) \quad (6)$$

In the above constraints, the  $\infty$  value represents a sufficiently large constant (e.g., the maximum of the width and height of a global bounding box) that causes the constraint to always be satisfied. For example, in Eq. 3, the inequality is always satisfied if the binary decision variable  $z_{ir}^{(lt)}$  is false as we do not need to put any constraints if we do not occupy region  $r$  with object  $i$ . However, if the variable is true, we require that the coordinate  $x_i$  is to the right of the  $x$ -boundary  $x_r^{(min)}$ . We create an equivalent constraint for the remaining three rectangular constraints (see Eq. 4-Eq. 6).

Finally, we add a constraint that resolves the decision variable  $z_{ir}^{(in)}$  to true if all four rectangular constraints hold:

$$4 \leq z_{ir}^{(lt)} + z_{ir}^{(rt)} + z_{ir}^{(dn)} + z_{ir}^{(up)} + \infty(1 - z_{ir}^{(in)}) \quad (7)$$

Once again, if  $z_{ir}^{(in)}$  is false, the inequality holds as we do not need to satisfy the rectangle inclusion constraints if our object  $i$  is not in region  $r$ . Otherwise, all four inclusion variables must be true, by summing to four, to indicate that the object  $i$  occupies region  $r$ .

We then add an additional constraint to ensure that each object occupies at least one region:

$$\forall i, \sum_r z_{ir}^{(in)} \geq 1 \quad (8)$$

Next, we ensure that all pairs of objects in the scene do not overlap. To do this, we constrain the bounding boxes of each object to not overlap. Let  $a_i$  be half of the side length of the bounding box

of object  $i$ . There are four ways a pair of objects with axis-aligned bounding rectangles can avoid overlapping: object  $i$  is left of object  $j$ , object  $i$  is right of object  $j$ , object  $i$  is above object  $j$ , or object  $i$  is below object  $j$ . We create indicator variables representing these conditions as  $c_{ij}^{(lt)}$ ,  $c_{ij}^{(rt)}$ ,  $c_{ij}^{(up)}$ ,  $c_{ij}^{(dn)}$ , respectively. Next, we add the following constraints to the MIP to correctly set the collision indicator variables:

$$(x_i + a_i) \leq (x_j - a_j) + \infty(1 - c_{ij}^{(lt)}) \quad (9)$$

$$(x_j + a_j) \leq (x_i - a_i) + \infty(1 - c_{ij}^{(rt)}) \quad (10)$$

$$(y_i + a_i) \leq (y_j - a_j) + \infty(1 - c_{ij}^{(dn)}) \quad (11)$$

$$(y_j + a_j) \leq (y_i - a_i) + \infty(1 - c_{ij}^{(up)}) \quad (12)$$

If there is no collision between  $i$  and  $j$ , at least one of the four indicator variables must be true. Hence, we set an additional constraint to ensure no collision:

$$\forall_{i,j}, c_{ij}^{(lt)} + c_{ij}^{(rt)} + c_{ij}^{(dn)} + c_{ij}^{(up)} \geq 1 \quad (13)$$

We solve the MIP problem with IBM’s CPLEX optimization library [64].

## D Domains

The following subsections provide a brief description of the search space, objective, and measure functions in our domains.

### D.1 Shared Control Teleoperation

A teleoperation task involves a user providing joystick inputs to a robot arm with the intention of reaching a goal in the environment. It is generally hard for users to teleoperate a 6-DoF robot arm to the correct configuration [51]. Thus, in shared control teleoperation, the robot attempts to infer the human goal from a set of candidate goals by observing the low-dimensional joystick inputs provided by the user.

Following the shared control teleoperation framework from previous work [51], the robot solves a POMDP with the user’s goal as a latent variable while it updates its belief about the goal based on the human input trajectory assuming a noisily-optimal user. To enable real-time decision-making, the robot performs hindsight optimization to approximate the POMDP and assumes a first-order approximation of the value function. This results in the robot’s actions being a weighted average of the optimal path towards each goal, where the weights are proportional to the respective goal probabilities.

To formalize the scenario generation problem in the shared teleoperation domain, we follow the QD formulation of prior work [1, 2]. The environment parameters are the positions of the two goal objects in a bounded workspace, constrained to be reachable by the robot arm. The simulated human provides a trajectory of joystick inputs towards their goal object, parameterized by a set of waypoints. The human model parameters are disturbances to these waypoints. The scenario parameters  $\theta$  include the environment and human model parameters. The objective function  $f$  in the QD search is the time taken to reach the correct goal, with a maximum time limit of 10 seconds if the robot fails to reach the goal. The search aims to find scenarios that are diverse with respect to the noise in human inputs and the scene clutter, thus the measures  $m$  are the human variation from the optimal path and the distance between goals.

### D.2 Shared Workspace Collaboration

We consider a package labeling task, which instantiates the human-robot shared workspace collaboration domain of previous work [42, 53]. The human and the robot have different actions, i.e., the

human labels a package while the robot presses a stamp, and they share a set of goals, i.e., boxes to perform the task. The human and the robot cannot work simultaneously on the same object and the task finishes when all boxes are labeled and stamped.

We assume that the human picks a label for an object from a starting point and moves towards that object. Different boxes require different labels, thus we model the human as attempting to reach the box corresponding to the label they picked up, regardless of the robot’s actions. On the other hand, the robot can switch its goal while moving, since stamping can be performed on any goal object with the same tool. This domain is more complex than the shared control teleoperation task because it includes manipulating a sequence of objects, rather than reaching a single object, and the objects are in disjoint workspace regions.

As in the shared control teleoperation task, the robot reasons over the human goal by treating the human as noisily-optimal. However, unlike in shared control teleoperation, the robot attempts to avoid the goal intended by the human.

The scenario parameters consist of the locations of three goal objects in a larger, disconnected workspace. We set the workspace boundaries to the quadrants of the L-shaped table in Fig. 1 that are reachable by both the human and the robot arm. We model the human as moving to their goal while avoiding obstacles by solving a softmax MDP. The objective  $f$  is again the time to task completion since we wish to find challenging scenarios.

We choose two sets of measures  $m$  described below:

**Minimum distance between goal objects and maximum wrong goal probability:** We adopt the minimum distance measure from the shared control teleoperation domain in previous work [1]. Furthermore, one of the failure scenarios found in that work was caused by incorrect inference of the human goal by the robot. Thus, we set as our second measure the maximum probability that is assigned to the wrong goal by the robot during the task, to search for potential failures in which the robot actually infers the human goal correctly.

**Robot path length and total wait time:** In the shared workspace collaboration task that we consider, there are two main sources of delay: the robot needing to move across the two workspaces to reach different goals, and the wait time caused due to both the human and the robot wanting to work on the same goal. Hence, we choose the path length of the robot and the total wait time as the two measures to see how the team performance changes as these are varied.

## E Human and Robot Policies

### E.1 Robot Policy

We adopt the robot policy defined in prior HRI works [51, 42] that introduced the domains considered in this paper. In both domains in this paper, the robot solves a POMDP with human goal as the latent variable. As in prior work [51], the robot assumes that the human is stochastically optimal and updates its belief based on observed human actions. It performs hindsight optimization to calculate the values and update the belief in real-time, followed by a first-order approximation to select the optimal action that maximizes the Q-value. In both domains, we follow the cost function definition in the corresponding prior work [51, 42], which makes the resulting optimal value function proportional to the distance to the goal and the optimal policy a straight line.

We briefly discuss the specifics of the robot policy in the two domains below. In both domains, the robot action is computed as the twist that should be applied to its end effector, which is then converted to the required joint velocities by inverse kinematics computation.

#### E.1.1 Shared Control Teleoperation

In shared control teleoperation, the human provides an input action to the robot. The Q-value of this action is defined as the sum of the cost incurred while executing the action and the value at the new

position after action execution. The robot’s belief is then updated based on the difference between the value and the Q-value at the current position corresponding to each goal.

Hindsight optimization followed by first-order approximation results in the robot’s assistive action being a weighted average of the straight-line paths to each goal, weighted by the corresponding probabilities assigned to them in the belief.

In App. G.1, we consider a different robot policy called policy blending [52]. The robot fully follows the user inputs while updating its belief like before. Once the probability assigned to a goal is higher than a threshold, the robot takes over and moves to the predicted goal.

### E.1.2 Shared Workspace Collaboration

In shared workspace collaboration, the human acts independently. Hence, we maintain two sets of value functions - one for the human and one for the robot. We calculate the human Q-value as the sum of the cost of executing the current action and the value at the new position after action execution, similar to the shared control teleoperation domain. The robot’s belief is updated based on the difference between human value and human Q-value at the current position corresponding to each goal.

We track the constraints on the robot’s goals with the feasible goal-set formulation from prior work [42]. For each potential human goal, the robot maintains a set of goals that it has not worked on and is different from the human goal. The goal set can be empty for some candidate human goals if the robot has finished working on all other goals. The robot then treats all the goals that it has not worked on as the feasible goal set corresponding to that human goal. For action calculation, the robot creates a mapping from each human goal to a corresponding goal-to-go, which is the goal with minimum value (the closest goal) in the corresponding feasible goal set.

The robot’s action is based on the robot’s value functions. Since we assume that the robot acts optimally, we do not explicitly calculate these values and simply assume a straight-line path to each goal. Hindsight optimization followed by first-order approximation once again results in the robot’s action being a weighted average of optimal actions towards each goal-to-go.

Specifically, let  $b(g)$  be the probability assigned to goal  $g$  and let  $F(g)$  be the goal-to-go corresponding to human goal  $g$ . Then, the weight corresponding to goal  $g'$  is given by  $\Sigma_{g:F(g)=g'} b(g)$ .

## E.2 Human Policy

### E.2.1 Shared Control Teleoperation

In shared control teleoperation, we search for human policy parameters in the form of noise added to the waypoints from the starting location to the intended goal location. The human policy keeps track of the waypoints and computes the waypoint-to-go and the corresponding velocity based on the current position of the robot arm.

### E.2.2 Shared Workspace Collaboration

In shared workspace collaboration, the human moves independently towards the goal and avoids obstacles on the way. We model the human policy through a softmax MDP whose values are pre-computed before simulating the scenario.

First, we discretize the space in which the human can move into a grid with cell sizes equal to the size of the goal object so that each goal is in one cell. We treat these cells as the states of the MDP and allow the human to move to any neighboring cell, receiving a reward of either  $-0.01$  for moving to an orthogonally adjacent cell,  $-0.01\sqrt{2}$  for moving to a diagonally adjacent cell,  $-1$  for moving into an obstacle, or  $1$  for moving into a goal cell. We set the discount factor to  $0.9999$  and perform softmax value iteration [54] with a softmax temperature of  $0.001$  to compute the Q-values for each state-action pair.



725 Since we have three goals in a scenario, we compute three sets of Q-values, one corresponding to  
726 each goal. Each value iteration instantiation treats the scenario’s other goals as obstacles.

727 During simulation, the human policy converts the current location of the human into the grid cell it  
728 belongs to, chooses the next grid cell based on the Q-values corresponding to the current goal, and  
729 returns the velocity required to move to the center of the next cell.

730 In App. G.2, we consider a new setting in which we search over two human model parameters: the  
731 inverse of softmax temperature (higher values result in a more rational human) and a multiplier to  
732 the velocity (higher multiplier makes the human move faster).

## 733 F Implementation Details

734 We implement surrogate assisted scenario generation in a server-client framework. The server sim-  
735 ulates a given scenario in OpenRAVE [65] while the client executes QD search to generate new  
736 scenarios.

### 737 F.1 Scenario Simulation

738 We adapt the scenario simulation code from the open-source implementation of shared autonomy  
739 via hindsight optimization [66] to include the feasible goal set formulation for the shared workspace  
740 collaboration domain (described in App. E.2) and to simulate generated scenarios instead of a fixed  
741 one.

742 We start a flask server that waits for the client to run QD search and send solutions to evaluate. Once  
743 we receive a candidate solution, we pass it through the MIP solver and instantiate the objects, the  
744 robot, and the human in the OpenRAVE simulator.

745 We discretize the simulation into *ticks*, with each tick being divided into three phases that are ex-  
746 ecuted in sequence: human action selection, robot action selection, and environment simulation.  
747 Human action selection and robot action selection follow the policy given in App. E.2 and App. E.1  
748 respectively. In the environment simulation phase, the actions are executed, moving the human and  
749 the robot to a new state.

750 The shared control teleoperation task executes these phases in a loop until the robot reaches the  
751 intended human goal or the time limit of 10 seconds is reached.

752 Since the shared workspace collaboration task consists of multiple steps, the human and the robot  
753 policies are wrapped into state machines. The human state machine has five states: a) *moving to*  
754 *a goal*; b) *waiting for space*; c) *working on a goal*; d) *resetting*; e) *done*. The human is initially  
755 in *moving to goal* state and simply selects actions according to the human policy. Once a goal is  
756 reached, the human waits till the goal is free to work on (*waiting for space*) and then starts working  
757 on the goal (*working on a goal*). Once the work is complete, the human switches to the terminal  
758 state, *done*, if that was the last goal or moves back to the initial position (*resetting*). To simulate  
759 working on the goal and moving back to the initial position, we simply pause the human for a  
760 specified amount of time. After the reset, the human starts moving to the next goal (*moving to goal*).

761 The robot state machine has six states: a) *moving to a goal*; b) *replanning*; c) *waiting for space*; d)  
762 *working on a goal*; e) *resetting*; f) *done*. The state transitions are similar to those of the human state  
763 machine, except for the *moving to a goal* state. Since the robot can get into configurations close to  
764 self-collision or joint limits when following a straight line path, it needs to replan back to the start  
765 before moving again. We simulate this by switching to *replanning* state, moving the robot back to  
766 its initial position, and then switching back to *moving to a goal* state.

767 The shared workspace collaboration task ends either after 100 seconds or after both the human and  
768 the robot reach the *done* state.



## 769 F.2 QD Search

770 We implement QD search on the client by modifying the pyribs library [67] and the open-source  
771 code for DSAGE [21] to match Algorithm 1.

772 We implement the inner loop through a pyribs *scheduler* that interfaces a QD algorithm via two  
773 functions: *ask*, which outputs candidate solutions from the algorithm, and *tell*, which accepts the  
774 corresponding objective and measures, adds them to the archive, and updates the algorithm param-  
775 eters. The scheduler interfaces CMA-MAEGA and CMA-MAE for DSAS and SAS respectively.  
776 The inner loop runs fully on the client, exploiting the surrogate model described in App. B.

777 We then select a set of solutions from the surrogate archive and send it to the simulation server for  
778 evaluation. The objective and measures obtained from the simulation are returned by the server,  
779 which we add to the ground-truth archive and the dataset.

780 For baselines, we use the existing implementation of CMA-MAE and MAP-Elites in pyribs. Addi-  
781 tionally, for ease of execution, we implement Random Search similar to a QD algorithm in the pyribs  
782 framework. It simply returns a batch of uniformly randomly sampled candidate solutions whenever  
783 requested. Since these baselines do not leverage a surrogate model, the candidate solutions are  
784 always sent to the simulation server for evaluation.

785 To include objective regularization, we maintain two archives, the *final archive* that retains solutions  
786 maximizing the unregularized objective, and the *training archive*, which maintains scenarios that  
787 maximize the regularized objective to guide the QD search. The pyribs scheduler interfaces with  
788 the *training archive*, while solutions are directly added to the *final archive*. For surrogate assisted  
789 algorithms, the surrogate archive acts as the *training archive* while the ground-truth archive acts as  
790 the *final archive*.

791 We include the search details specific to the domains below.

### 792 F.2.1 Shared Control Teleoperation

793 In shared control teleoperation, we search over the  $\langle x, y \rangle$  coordinates of two goal objects and five  
794 noise variables that define the human path towards the goal, creating a 9-dimensional search space.

795 We define the measures as the distance between the goals  $\sqrt{(x_1 - x_2)^2 + (y_1 - y_2)^2}$ , and the vari-  
796 ation in human input  $\sqrt{\sum_{i=1}^5 \theta_{h,i}^2}$ , where  $\theta_h$  refers to the five noise parameters in the generated  
797 solution. Following prior work [1], we assume the ranges of the measures to be  $[0, 0.32]$  for the  
798 distance and  $[0, 0.112]$  for variation, and create an archive with  $25 \times 100$  cells.

799 We adopt the hyperparameters for MAP-Elites from prior work [1], setting the standard deviation  
800 of perturbation,  $\sigma$ , to 0.01 for parameters corresponding to the goal coordinates and 0.005 for those  
801 corresponding to the human noise. For CMA-MAE, SAS, and DSAS, we set the initial standard de-  
802 viation for CMA-ES,  $\sigma_0$ , to 0.01, archive learning rate,  $\alpha$ , to 0.1, and minimum acceptance threshold,  
803  $min_f$ , to 0. We set all other hyperparameters to their default values defined in pyribs.

### 804 F.2.2 Shared Workspace Collaboration

805 In shared workspace collaboration, we search over the  $\langle x, y \rangle$  coordinates of three goal objects, cre-  
806 ating a 6-dimensional search space.

807 The four measure functions in our experiments are defined as follows:

- 808 1. Minimum distance between goal objects (archive range  $[0.05, 0.32]$ ; discretized into 27  
809 archive cells):  $\min_{i \neq j} \sqrt{(x_i - x_j)^2 + (y_i - y_j)^2}$
- 810 2. Maximum wrong goal probability (archive range  $[0.35, 1]$ ; discretized into 65 archive  
811 cells): Let  $b^{(max)}(t)$  be a function that returns the highest probability assigned by the robot  
812 to a goal other than the true human goal at time  $t$ . Maximum wrong goal probability is  
813 defined as the maximum value attained by  $b^{(max)}(t)$  during the scenario:  $\max_t b^{(max)}(t)$ .

Table 2: QD-score at the end of 10,000 evaluations.

|               | Shared Autonomy                         | Collaboration I                           | Collaboration II                         |
|---------------|-----------------------------------------|-------------------------------------------|------------------------------------------|
| DSAS          | <b>21,400.33 <math>\pm</math> 45.91</b> | 106,874.93 $\pm$ 844.00                   | <b>19,261.95 <math>\pm</math> 182.57</b> |
| SAS           | 21,043.49 $\pm$ 40.08                   | <b>112,962.22 <math>\pm</math> 572.96</b> | <b>18,733.82 <math>\pm</math> 182.40</b> |
| CMA-MAE       | 17,972.31 $\pm$ 74.71                   | 87,399.75 $\pm$ 1,085.14                  | 15,612.29 $\pm$ 284.34                   |
| MAP-Elites    | 11,757.84 $\pm$ 358.31                  | 67,731.48 $\pm$ 576.30                    | <b>18,435.18 <math>\pm</math> 398.87</b> |
| Random Search | 9,647.24 $\pm$ 24.94                    | 62,376.62 $\pm$ 200.68                    | 13,856.14 $\pm$ 156.67                   |

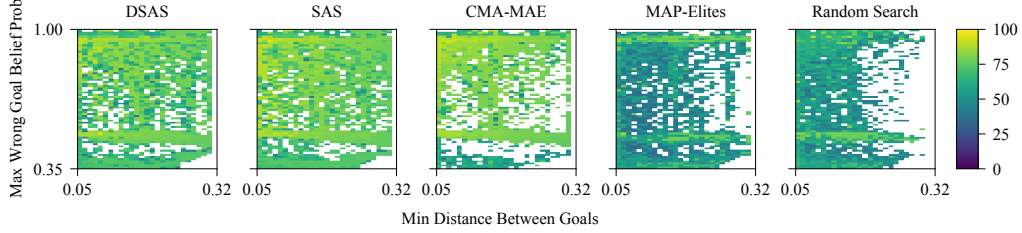

Figure 8: Comparison of the final archive heatmaps in the collaboration I domain.

3. Robot path length (archive range  $[1, 5]$ ; discretized into 20 archive cells): Let the robot's trajectory in the scenario be a function  $\tau : [0, 1] \rightarrow \mathbb{R}^2$ , with  $\tau(0)$  and  $\tau(1)$  denoting the coordinates of the start and end-points respectively. The robot path length is defined as the length of this trajectory:  $\int_0^1 \|d\tau\|_2$ .
4. Total wait time (archive range  $[0, 5]$ ; discretized into 50 archive cells): Let  $w(t)$  be a function that returns 1 when either the robot or the human state machine is in *waiting for space* state (see App. F.1) and 0 otherwise. Total wait time is defined as  $\int_0^T w(t)dt$ , where  $T$  is the total scenario time.

Note that we approximate the integrals with discrete sums of the corresponding values at each simulation tick.

We tuned the initial standard deviation for CMA-ES,  $\sigma_0$ , in the case of CMA-MAE, SAS, and DSAS and set it to 1. We also tuned the perturbation standard deviation,  $\sigma$ , for MAP-Elites and set it to 0.1. We set  $\alpha = 0.1$ ,  $min_f = 0$ , and all other hyperparameters to the default values provided in pyribs.

In the new setting described in App. G.2, we add two additional parameters to the search: the inverse of softmax temperature (higher values result in a more rational human) and the coefficient of velocity (higher coefficient makes the human move faster). We limit these parameters to ensure that the scenarios are not bottlenecked by an unrealistically slow or irrational human.

## G Additional Results

We tabulate the results from our experiments in Table 2. We also show the final archives in the collaboration I (Fig. 8) and collaboration II (Fig. 9) domains.

We observe that the archives generated by DSAS and SAS are more densely packed compared to other algorithms in collaboration I. In collaboration II, we see that CMA-MAE, SAS, and DSAS find fewer solutions in the bottom left part of the archive (mostly corresponding to all goal objects in one workspace region) compared to MAP-Elites and random search, but find more and higher quality solutions in other parts of the archive which requires placing the goals in multiple regions.

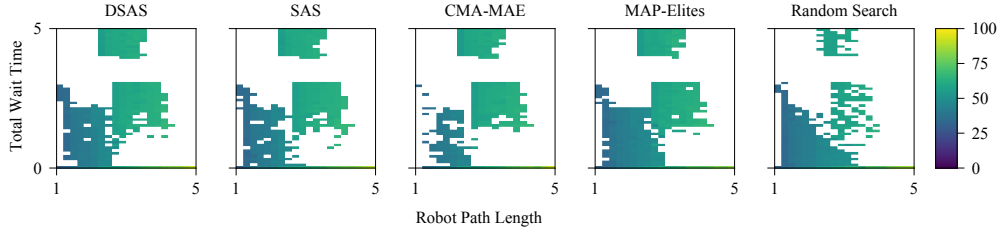

Figure 9: Comparison of the final archive heatmaps in the collaboration II domain.

Table 3: QD-score at the end of 10,000 evaluations.

|               | Teleoperation (Policy Blending)           | Collaboration I (Human Policy Search)         |
|---------------|-------------------------------------------|-----------------------------------------------|
| DSAS          | <b>41, 249.88 <math>\pm</math> 205.56</b> | 106, 573.18 $\pm$ 1, 461.34                   |
| SAS           | 40, 726.15 $\pm$ 300.61                   | <b>120, 789.83 <math>\pm</math> 1, 378.82</b> |
| CMA-MAE       | 33, 797.07 $\pm$ 1, 455.82                | <b>120, 687.02 <math>\pm</math> 2, 959.76</b> |
| MAP-Elites    | 24, 151.97 $\pm$ 836.97                   | 81, 006.04 $\pm$ 2, 483.23                    |
| Random Search | 19, 850.68 $\pm$ 184.97                   | 65, 513.84 $\pm$ 334.12                       |

### G.1 Additional Setting: Shared Control Teleoperation with Policy Blending

The QD formulation for scenario generation is independent of the robot and human policies. Here, we show scenario generation with a new robot policy, policy blending (App. E.1), in the shared control teleoperation domain without any modifications to the QD hyperparameters or the surrogate model architecture.

Table 3 shows the QD-score at the end of 10,000 evaluations. We see that the surrogate assisted algorithms outperform other algorithms, showing that these algorithms can work across multiple robot policies. Note that the maximum time for a scenario was set to 20s, so the QD-scores are around twice as large as in the main shared teleoperation experiments.

### G.2 Additional Setting: Shared Workspace Collaboration with Human Policy Search

In the main shared workspace collaboration experiments, the scenario was only parameterized by object locations. However, as described in our problem formulation, scenario parameters can also include parameters of the human model. Here, we perform an additional experiment in which we search for human model parameters in addition to the object locations to find failures in the collaboration I domain. We add two more scenario parameters related to human speed and rationality as described in App. F.2 and run the QD algorithms with no other changes to the hyperparameters.

We tabulate the QD-scores in Table 3. We see a small increase in the QD-scores of all algorithms compared to the main experiments (Table 2), since the QD search can now control the human policy to cause failures. Surprisingly, CMA-MAE performs similar to SAS. We hypothesize that this is caused by the sensitivity of the scenario outcomes to the human model parameters: Changes to human speed or rationality affect the human trajectory much more than changes to goal locations. Hence, predicting the trajectory and scenario outcomes is much harder in this setting compared to the main experiments. Thus, CMA-MAE, a model-free QD algorithm, performs as well as SAS and outperforms DSAS.

However, the failures broadly fell into the same categories as those found in the main experiment. We hypothesize that this results from the bounds of the human policy parameters. Rational and fast human actions allow the robot to accurately predict the human’s goal, leading to fast scenario completion. On the other hand, we have set the bounds on the parameters to not allow QD search to

867 make the human unrealistically slow or irrational. Hence, the failures found in this experiment are  
868 similar to those found with a fixed human policy.

### 869 G.3 Ablation: Effect of Objective Regularization

870 In Sec. 4, we proposed objective regularization as a way to guide QD search towards valid workspace  
871 configurations. While objective regularization benefits general QD search, we note that surrogate  
872 assisted methods like DSAGE inherit additional benefits. As the surrogate model makes predictions  
873 for all possible scenarios, and not only scenarios satisfying the workspace constraints, the QD search  
874 that exploits the surrogate model can move towards high-magnitude inputs in invalid regions of the  
875 scenario space when these inputs result in high objective values. Objective regularization helps pre-  
876 vent QD algorithms from exploiting errors in the surrogate model at extreme regions of the scenario  
877 parameter space.

878 To test the effect of objective regularization on performance, we choose the collaboration I domain  
879 and run 10 trials of DSAS, SAS, CMA-MAE, and MAP-Elites without objective regularization.  
880 Hence, due to numerical errors resulting from exploiting errors in the surrogate model, none of the  
881 SAS or DSAS runs without objective regularization could be completed.

882 We compare the results of MAP-Elites and CMA-MAE runs with their corresponding runs from the  
883 previous section that included objective regularization. Pairwise t-tests showed that MAP-Elites per-  
884 formed similarly with and without regularization, while CMA-MAE performed significantly worse  
885 without objective regularization ( $t = -7.08, p < 0.001$ ). We attribute this to the fact that perturba-  
886 tions of existing solutions in MAP-Elites are not guided by the objective values. On the other hand,  
887 CMA-MAE guides the search based on the objective improvements of the sampled solutions; hence  
888 objective regularization has a significant effect on performance.

## 889 H Additional Real World Scenarios

890 *Incorrect human goal inference with limited effect on robot motion (Fig. 5b):* We select a scenario  
891 from the archive generated by SAS with a relatively average scenario time of 77s and a very high  
892 maximum wrong goal probability of 0.9.

893 The human finishes working on G1 and the robot on G2. As the human moves towards G2, the robot  
894 incorrectly thinks that the human is moving to G3, which is near the optimal path to G2, causing  
895 the robot to slow down in anticipation of the human motion. After the human reaches G2, the robot  
896 continues moving to G3. Hence, the incorrect prediction does not affect the overall scenario time  
897 much.

898 *Long wait time due to both teammates needing to work on the same goal (Fig. 5d):* Finally, we select  
899 a scenario from a DSAS archive in the collaboration II domain that has a high human and robot wait  
900 time.

901 This scenario was simple, albeit unanticipated. The human goes to G1, followed by G2, while the  
902 robot goes to G2, followed by G1. The team coordinates smoothly until both agents need to work  
903 on G3 to finish the task, causing a delay.

## 904 I Scenarios with High Team Performance

905 In addition to finding failures, QD scenario generation can also find scenarios that are ideal for  
906 human-robot collaboration. As an example, we modified the objective function in the collaboration  
907 I domain to  $100 - T$ , with  $T$  being the scenario completion time that has a maximum value of 100s.  
908 We ran SAS, which performed the best in this domain, and visualized example scenarios. We found  
909 two main types of success scenarios:

910 *Objects placed far apart to avoid confusion (Fig. 10a):* The first type of success involved placing  
911 the objects far apart to allow accurate goal inference. However, placing them too far would require

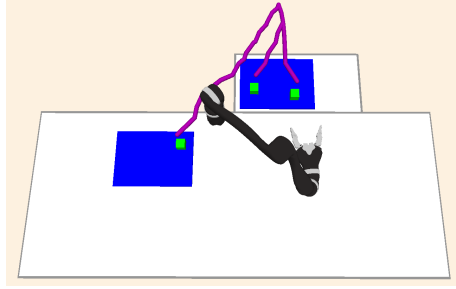

(a) High Team Performance Scenario 1

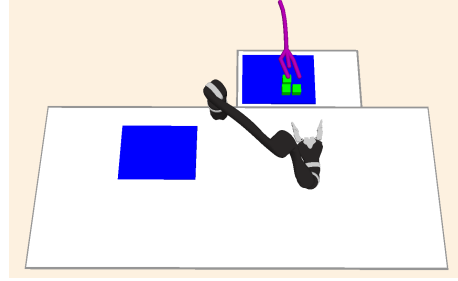

(b) High Team Performance Scenario 2

Figure 10: Examples of scenarios with high team performance. The purple line shows the simulated human path.

the human and the robot to move a lot, delaying completion. This scenario balanced these trade-offs, leading to a relatively short robot path length of 1.7m, a low maximum wrong goal probability of 0.4, and a fast completion time of 38s. The resulting goal completion order also avoided the failure found in Fig. 5d.

*Objects placed close together to quickly change goals (Fig. 10b):* The second type of success ignored making goal inference easier but instead made it easier for the robot to correct itself if required. Since the goals are close to each other, the robot can start moving towards them irrespective of human actions. Once the human starts working on a goal, the robot can quickly switch to a different goal. Despite having a high maximum wrong goal probability of 0.8, this scenario only took 31s to complete.
